# Supplementary material for: A comparative analysis of Dmc1 and Rad51 nucleoprotein filaments
Source: PubMed Central journal article supplement — Nucleic Acids Res. 2008 Jun 4;36(12):4057–66. doi: 10.1093/nar/gkn352 (PMC2475612; doi:10.1093/nar/gkn352), 2008-06-04
Supplement: gkn352_1.pdf [file gkn352_1.pdf]

SUPPLEMENTAL MATERIAL

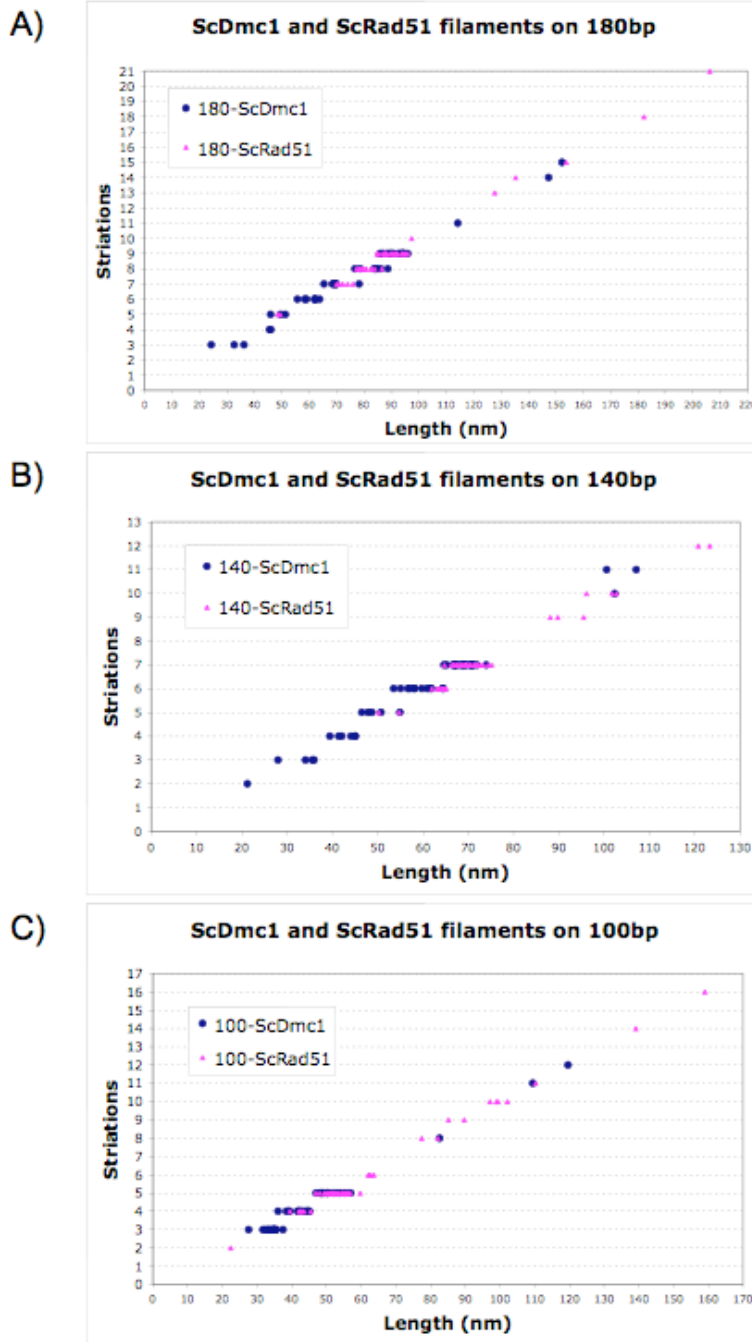

**Supplemental Figure 1. Striations versus length of ScDmc1 and ScRad51 filaments.** Graphs of filament length versus striation number of ScDmc1 and ScRad51 filaments on linear fragments of (a) 180bp, (b) 140bp, and (c) 100bp.
